# Supplementary material
Source: PubMed Central journal article supplement (PMC7280160)
Supplement: JZUSB21-0416-ESM.pdf [file JZUSB21-0416-ESM.pdf]

**Electronic supplementary materials**

<https://doi.org/10.1631/jzus.B2000109>

## **Analysis of an improved workflow of endoscope reprocessing for bedside endoscopic diagnosis and treatment on COVID-19 patients**

Qing GU<sup>†1</sup>, Hua-fen WANG<sup>††1</sup>, Ying FANG<sup>1</sup>, Ye LU<sup>3</sup>, Zhe SHEN<sup>2</sup>,  
Yan WANG<sup>1</sup>, Xin WU<sup>1</sup>, Li CEN<sup>2</sup>, Yi-shu CHEN<sup>2</sup>

<sup>1</sup>Center of Endoscopy, the First Affiliated Hospital, School of Medicine, Zhejiang University, Hangzhou 310003, China

<sup>2</sup>Department of Gastroenterology, the First Affiliated Hospital, School of Medicine, Zhejiang University, Hangzhou 310003, China

<sup>3</sup>Zhejiang Provincial Center for Disease Control and Prevention, Hangzhou 310003, China

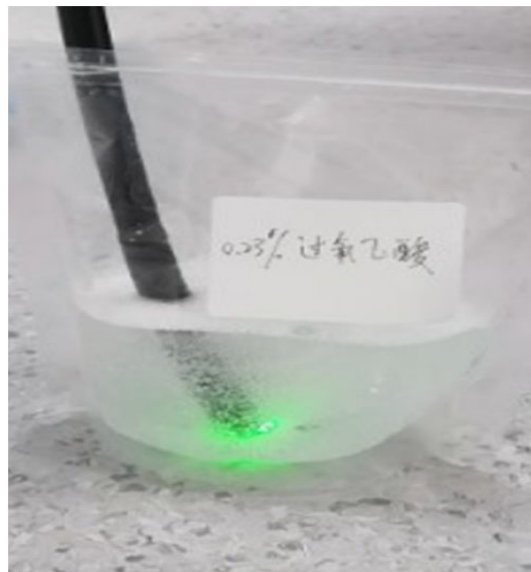

**Fig. S1 Treatment of contaminated endoscopy during bedside pre-processing**

For bedside pre-processing, put the lens end into a disposable plastic bag filled with 0.23% peroxyacetic acid solution. Flush the air/water channels and suction to avoid aerosol contamination

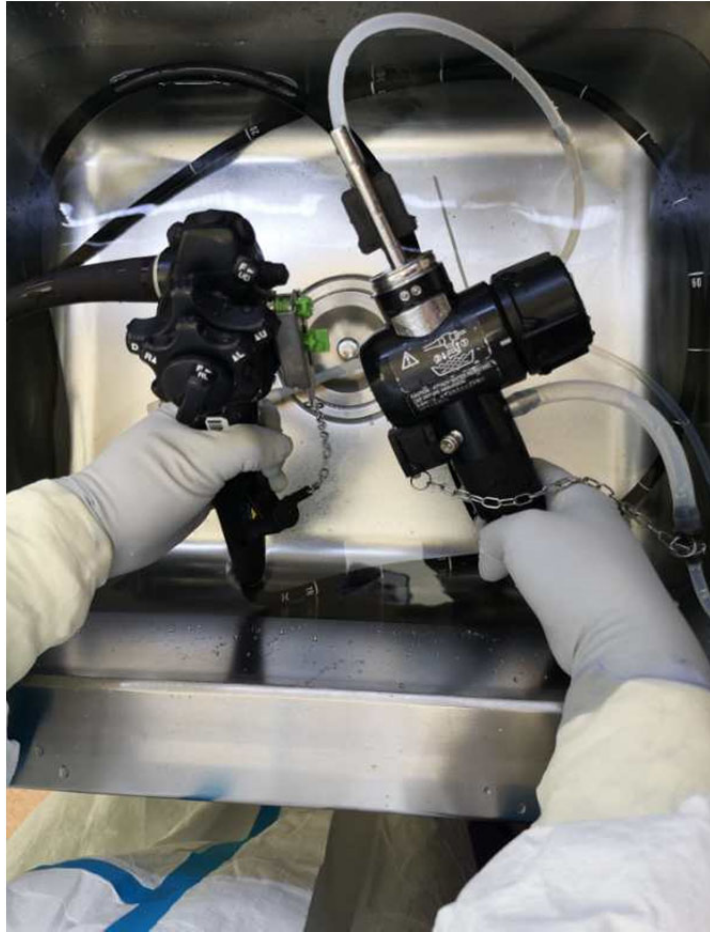

**Fig. S2 Treatment of perfusion channels**

Connect all perfusion channels and inject 0.23% peroxyacetic acid solution into the channels for continuous, dynamic flushing

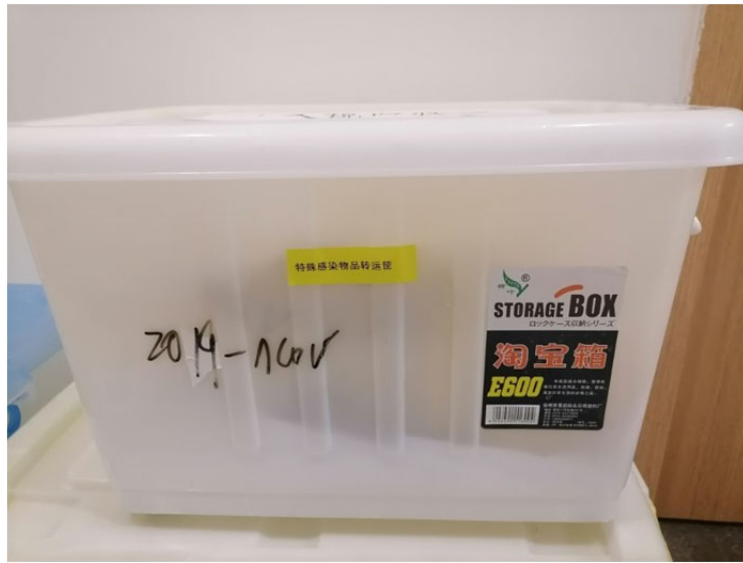

**Fig. S3 Transport of contaminated endoscopes**

Endoscope after use should be transferred in a special transport container marked with “2019-nCoV infection”
